# Supplementary material
Source: PubMed Central journal article supplement (PMC8102360)
Supplement: NIHMS1692674-supplement-Supplemental_Figures_and_Tables.pdf [file NIHMS1692674-supplement-Supplemental_Figures_and_Tables.pdf]

Figure S1

A

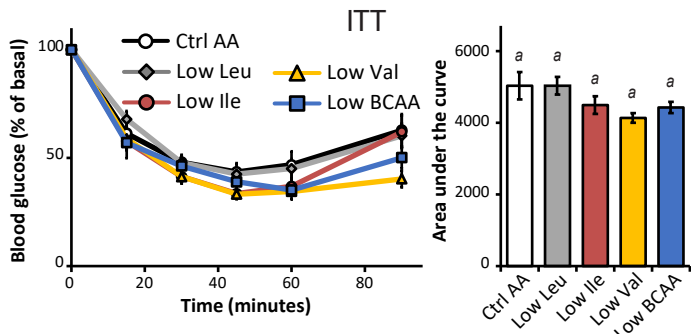

B

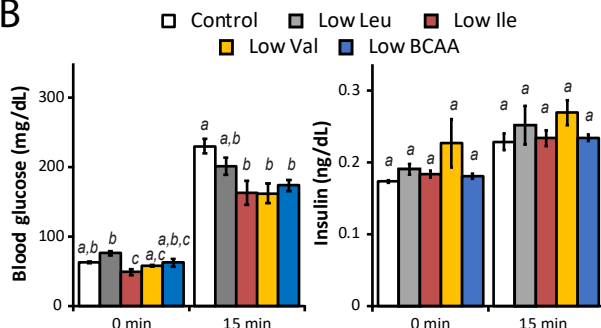

C

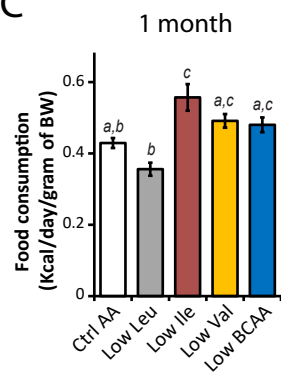

D

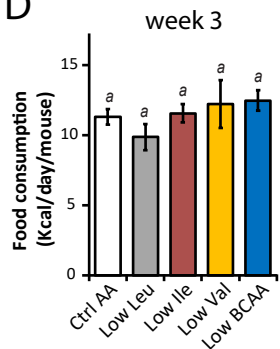

E

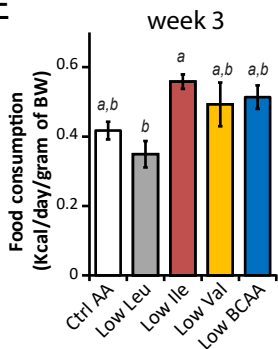

F

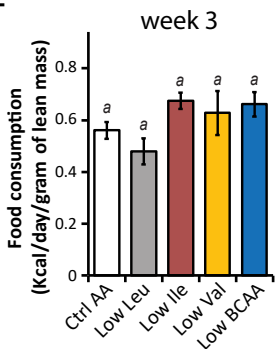

G

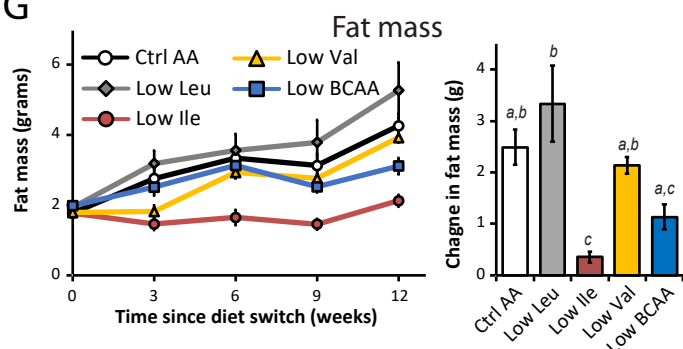

H

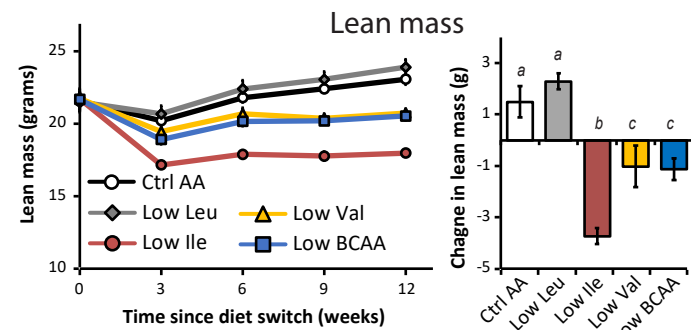

I

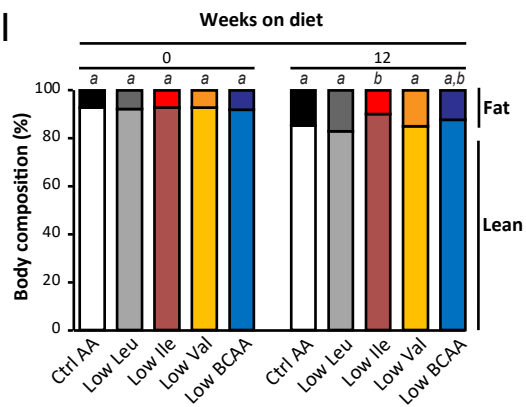

J

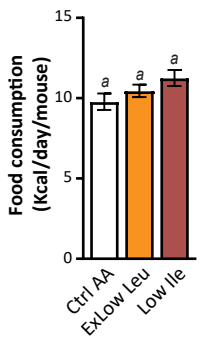

K

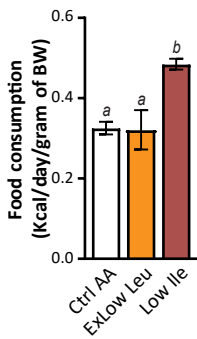

L

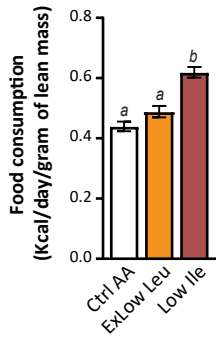

M

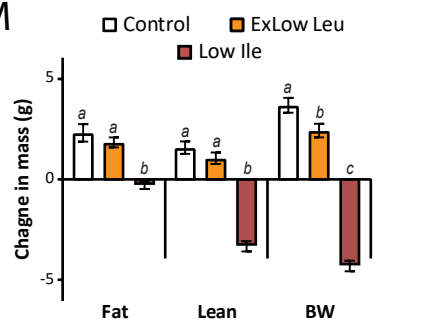

N

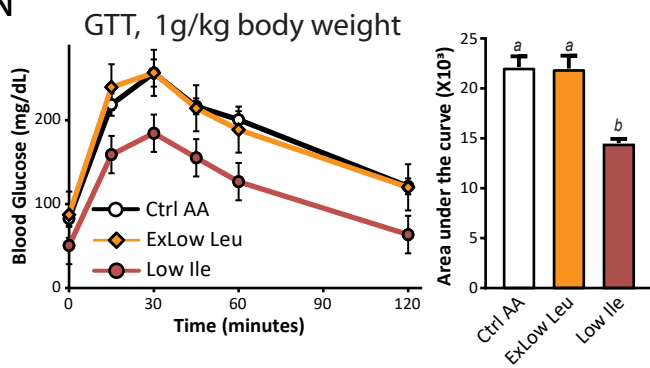

O

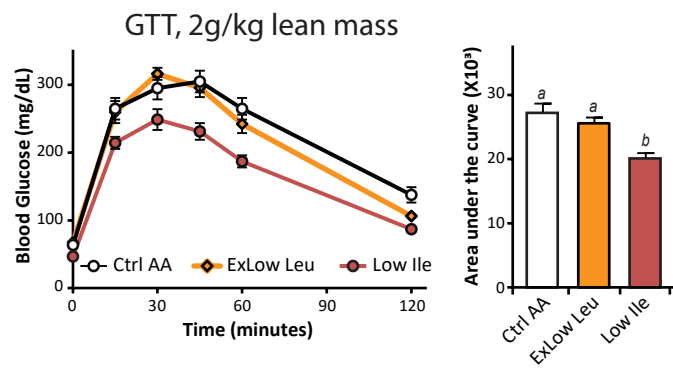

## Supplemental Figure Legends

### **Figure S1, related to Figure 1. Dietary restriction of isoleucine or valine, but not leucine, improves metabolic health.**

(A) Insulin tolerance test of mice after 4 weeks on the indicated diets (n = 9/group). (B) Fasting and glucose-stimulated glucose and insulin levels in mice after 6 weeks on the indicated diets (n=3-4/group). (C) Average food consumption during the first month on the indicated diets normalized by body weight. (D-F) Food consumption per mouse (D), normalized by body weight (E), or by lean mass (F) of mice during the third week on the indicated diets (n=3 cages of 3 animals each/group). (G) Fat mass and change in fat mass of mice after 12 weeks on the indicated diets (n=8-9/group). (H) Lean mass and change in lean mass of mice after 12 weeks on the indicated diets (n = 8-9/group). (I) Change in body composition over 12-week period (n=8-9/group). (J-L) Food consumption per mouse (J), normalized by body weight (K) or by lean mass (L) of mice fed on Ctrl AA, ExLow Leu and Low Ile diets after three weeks of diet feeding (n = 11-12/group). (M) Change in body composition of mice fed on Ctrl AA, ExLow Leu and Low Ile diets (n=11-12/group). (N) Glucose tolerance test (1 g/kg of body weight) of mice after 3 weeks feeding on Ctrl AA, ExLow Leu and Low Ile diets (n=12/group). (O) Glucose tolerance test (2 g/kg of lean mass) of mice after 4 weeks feeding on Ctrl AA, ExLow Leu and Low Ile diets (n = 11-12/group). (A-O) Significance was calculated using Tukey-Kramer test following ANOVA. Means with different letters are statistically different from one another,  $p < 0.05$ . Data are represented as mean  $\pm$  SEM.

Figure S2

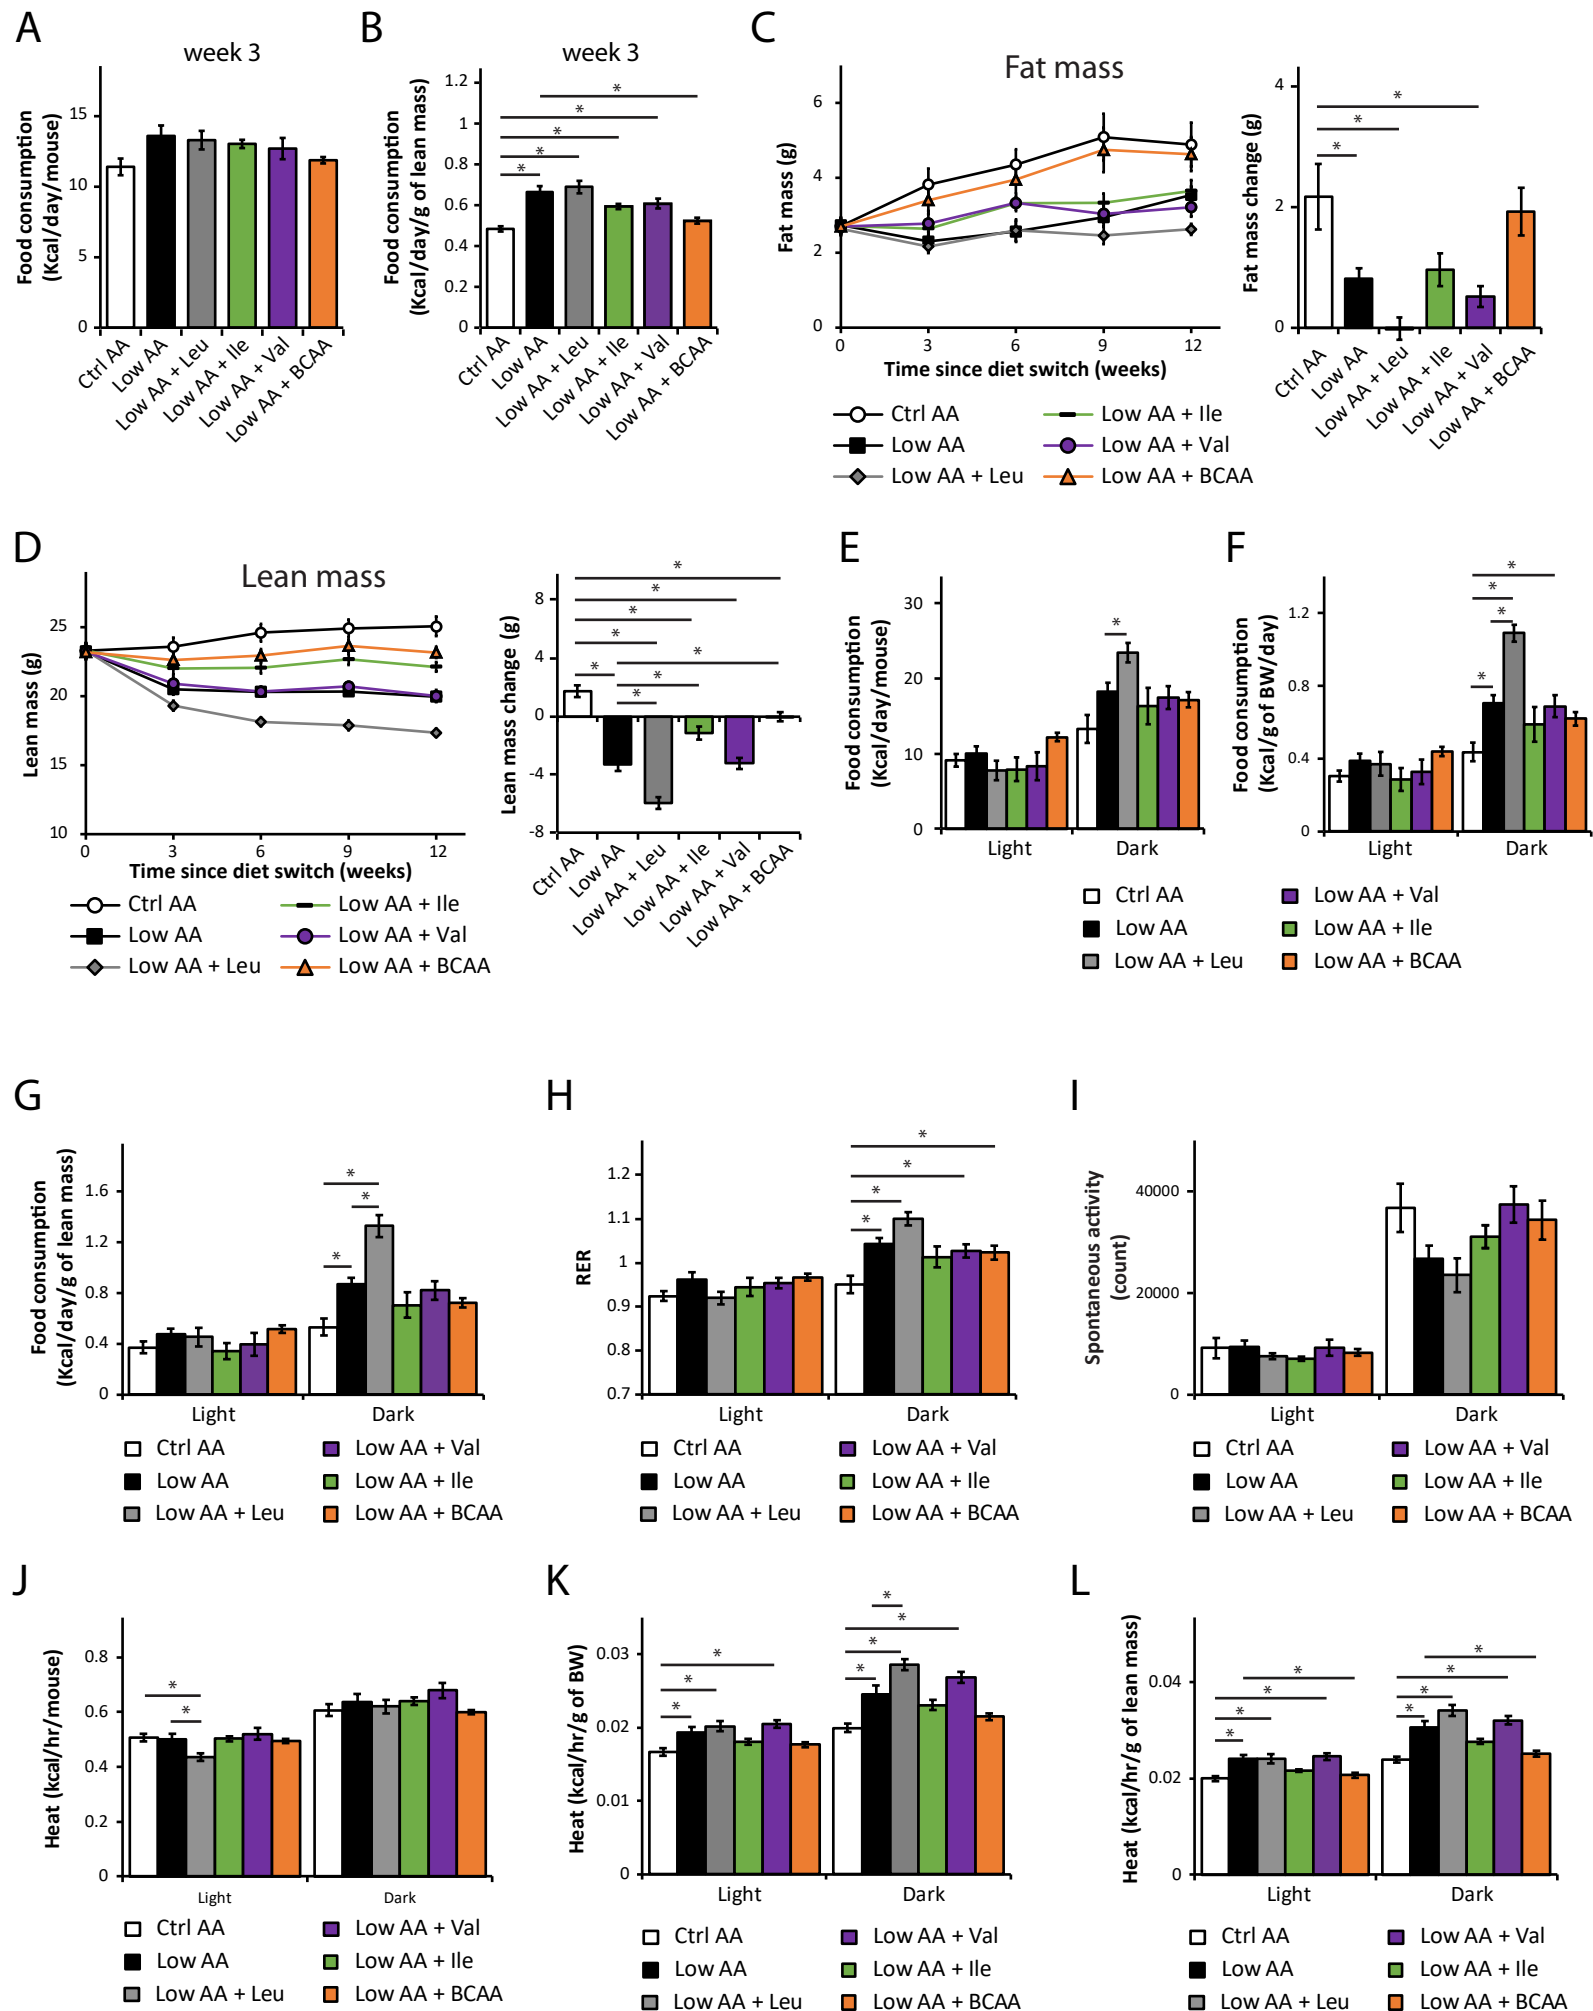

**Figure S2 related to Figure 2. Replenishing isoleucine attenuates the metabolic effects of PR.**

(A-B) Food consumption per mouse (A) and normalized by lean mass (B) during the third week on the indicated diets. (C) Fat mass and change in fat mass of mice after 12 weeks on the indicated diets. (D) Lean mass and change in lean mass of mice after 12 weeks on the indicated diets. (A-D) n=4 cages of 3 animals each/group (A-B) or n=11-12/group (C-D); \*p<0.05, Sidak's test post ANOVA, comparing all groups to the Ctrl AA and Low AA diet groups. (E-K) Food consumption per mouse (E), food consumption normalized by body weight (F), food consumption normalized by lean mass (G), RER (H), spontaneous activity (I), energy expenditure (heat) production per mouse (J), energy expenditure normalized by body weight (K) and energy expenditure normalized by lean mass (L) of mice after 7 weeks on the indicated diets were assessed by metabolic chambers. (E-L) n=4-8/group, \*p < 0.05, Sidak's test post ANOVA, comparing all groups to the Ctrl AA and Low AA diet groups. Data are represented as mean  $\pm$  SEM.

Figure S3

A

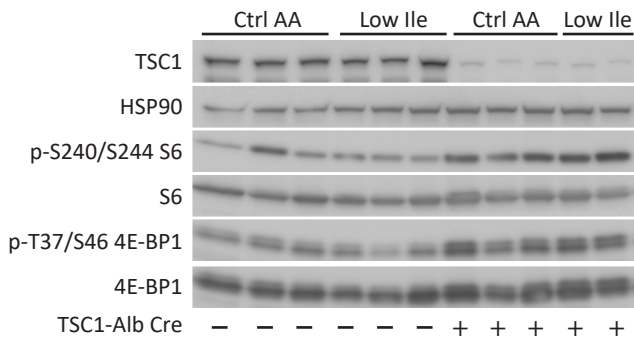

B

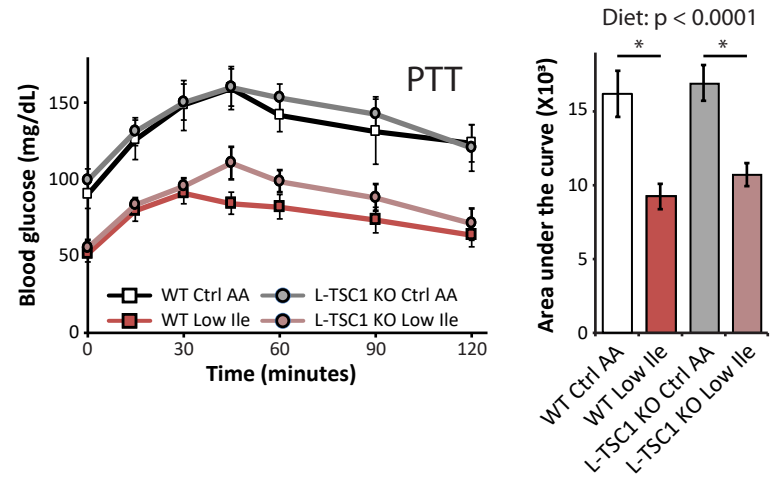

C

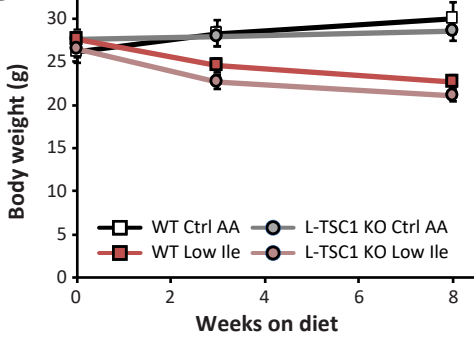

D

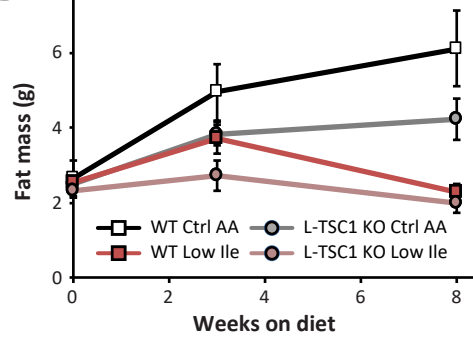

E

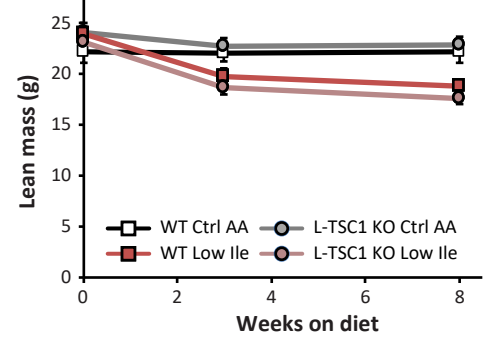

F

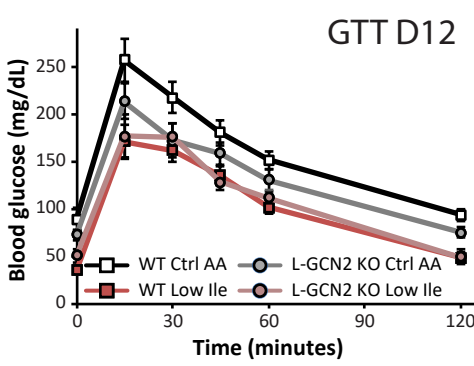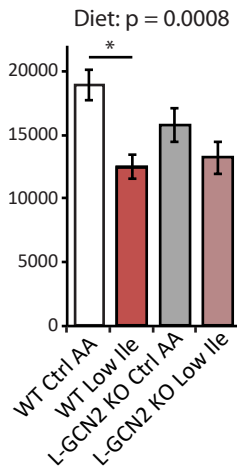

G

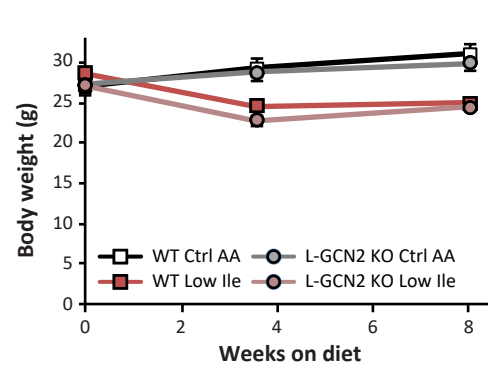

H

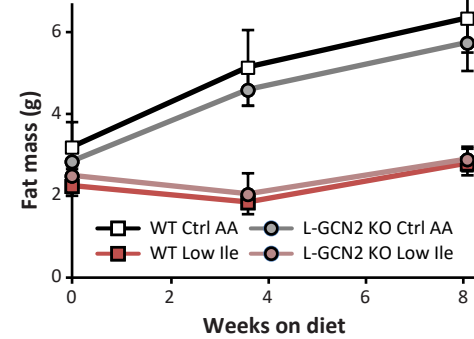

I

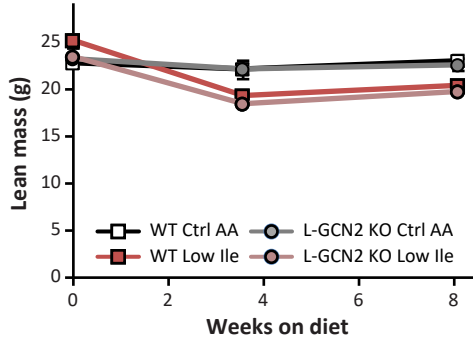

**Figure S3, Related to Figure 3. The metabolic effects of isoleucine restriction are independent of hepatic mTORC1 and GCN2 activity.** (A) Western blot analysis of mTORC1 signaling in the livers of fasted WT and L-TSC1 KO mice fed the indicated diets for 8 weeks. (B) Pyruvate tolerance test in WT and L-TSC1 KO mice fed the indicated diets for 4 weeks (n=7-8/group; for area under the curve, statistics for the overall effects of genotype, diet, and the interaction represent the p value from a two-way ANOVA, \*p<0.05, from a Sidak's post-test examining the effect of parameters identified as significant in the two-way ANOVA). (C-E) Body weight (C), fat mass (D), and lean mass (E) of WT and L-TSC1 KO mice on the indicated diets (n=7-8/group). (F) Glucose tolerance test in WT and L-GCN2 KO mice fed the indicated diets for 12 days (n = 6-7/group; for area under the curve, statistics for the overall effects of genotype, diet, and the interaction represent the p value from a two-way ANOVA, \*p<0.05, from a Sidak's post-test examining the effect of parameters identified as significant in the two-way ANOVA). (G-I) Body weight (G), fat mass (H), and lean mass (I) of WT and L-GCN2 KO mice on the indicated diets (n=6-7/group). Data are represented as mean  $\pm$  SEM.

# Figure S4

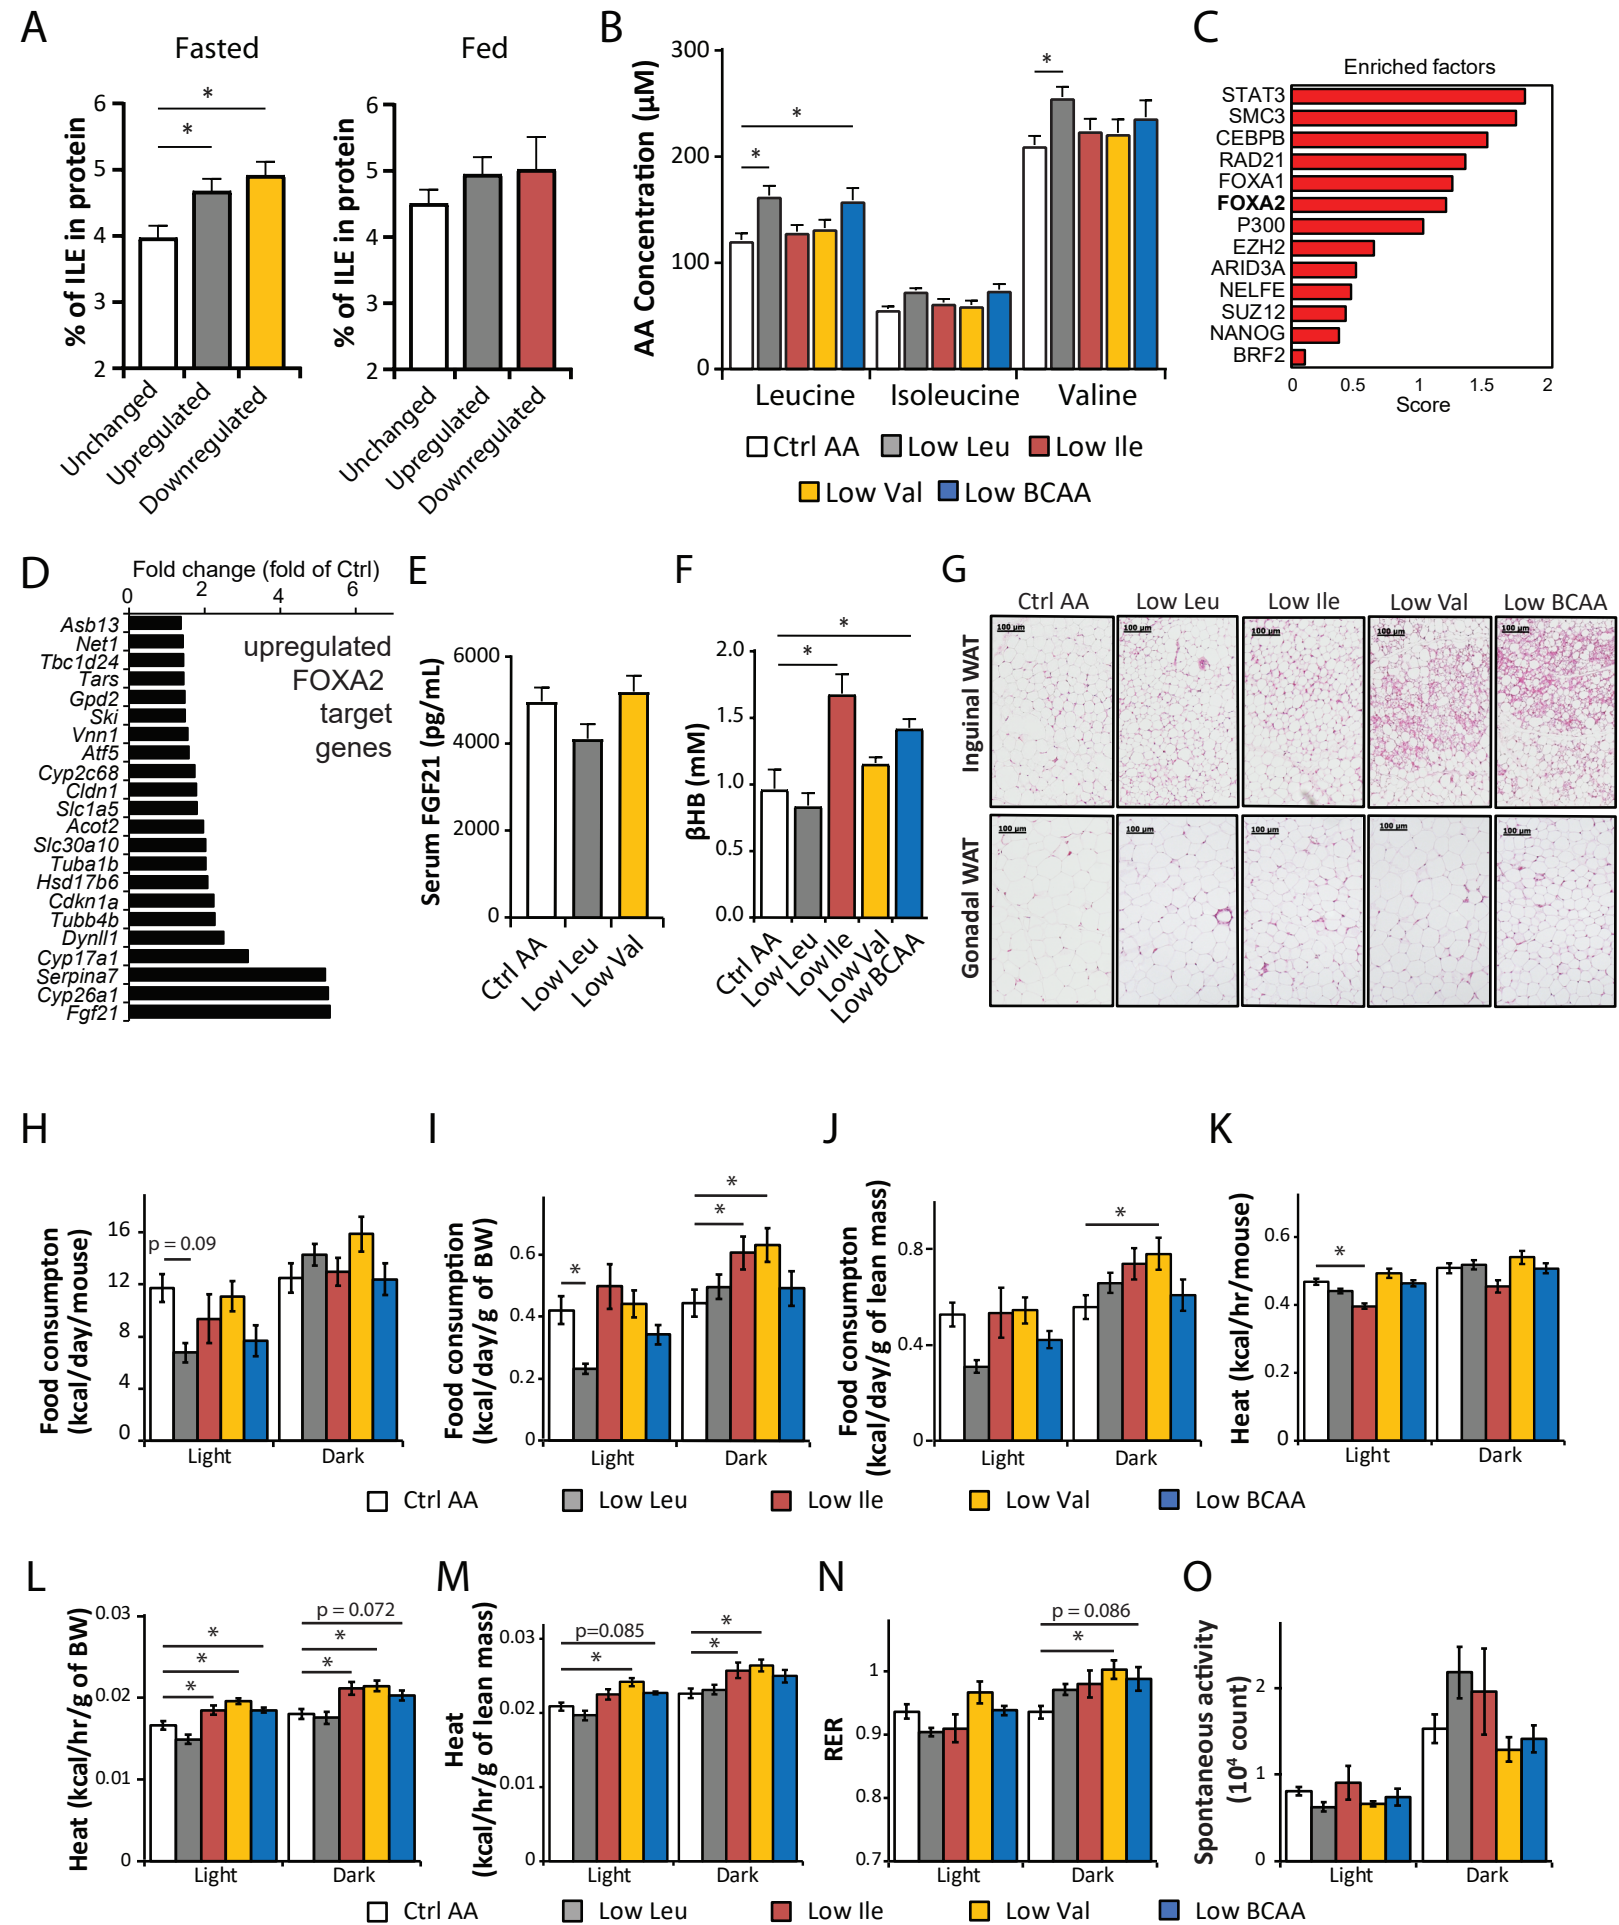

**Figure S4, related to Figures 4 and 5. Isoleucine restriction reprograms hepatic metabolism.**

(A) Isoleucine content of the proteins encoded by the 100 genes most significantly upregulated or downregulated by a Low Ile diet relative to the proteins encoded by the 100 genes least altered by a Low Ile diet (\* $p < 0.05$ , Tukey's test following ANOVA). (B) Levels of each BCAA in mice fed the indicated individual BCAA restricted mice after three weeks feeding on the indicated diets following an overnight fast ( $n = 9$ /group, significance was calculated using Dunnett's test following ANOVA, \* $p < 0.05$ ). (C) Significantly enriched transcription factors predicted to mediate the differential gene expression in the liver of fasted Low Ile fed mice. (D) FOXA2 target genes significantly upregulated by Low Ile feeding from RNA-seq data. (E) Plasma FGF21 level in Low Leu and Low Val fed mice after three weeks feeding on the indicated diets ( $n = 8$ /group, no significance detected using ANOVA). (F) Plasma  $\beta$ HB concentration in plasma of mice fed the indicated diets after an overnight fast ( $n=4-5$ /group, significance was calculated using Dunnett's test following ANOVA, \* $p < 0.05$ ). (G) Representative images of H&E stained inguinal white adipose tissue (iWAT) and gonadal white adipose tissue (gWAT) of mice after 12 weeks feeding on the indicated diets. Scale bar = 100  $\mu$ m.  $n=5-6$ /group. (H-O) Food consumption per mouse (H), food consumption normalized by body weight (I), food consumption normalized by lean mass (J), energy expenditure (heat) production per mouse (K), energy expenditure normalized by body weight (L), energy expenditure normalized by lean mass (M), RER (N), and spontaneous activity (O) of mice after 6 weeks on the indicated diets were assessed by metabolic chambers ( $n = 4-8$ /group; significance was calculated using Dunnett's test following ANOVA, \* $p < 0.05$ ). (G, L) Ctrl AA and Low Ile data are duplicated from Figure 5 to allow comparison. Data are represented as mean  $\pm$  SEM.



Figure S5

A

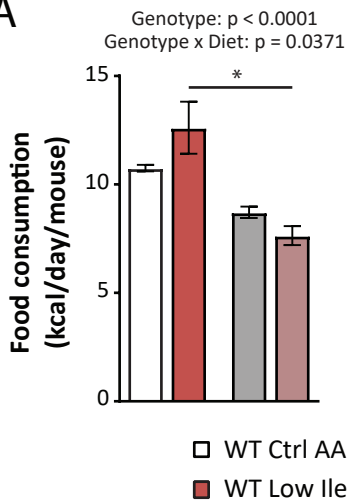

B

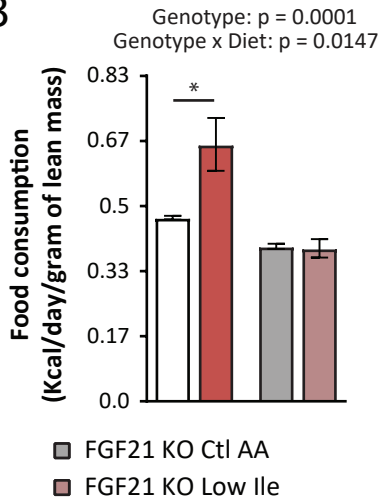

C

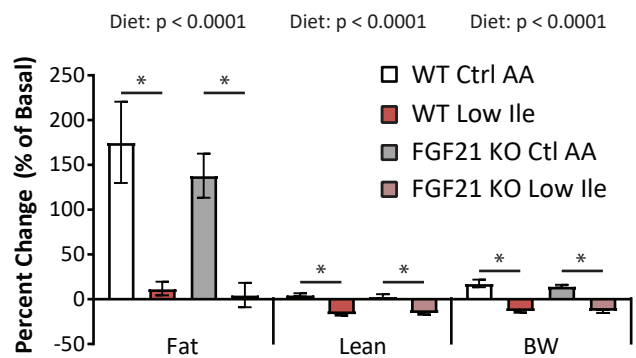

D

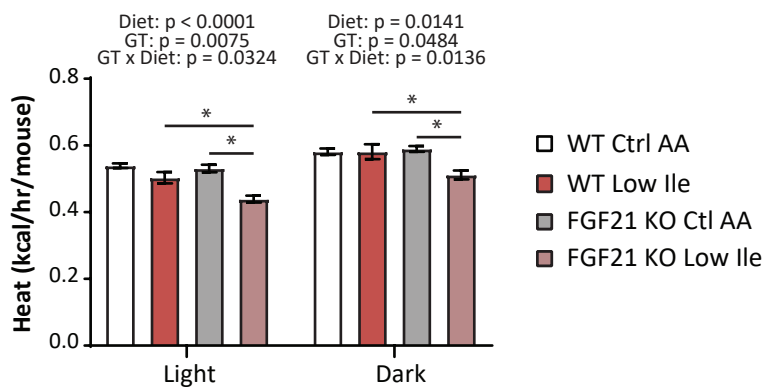

E

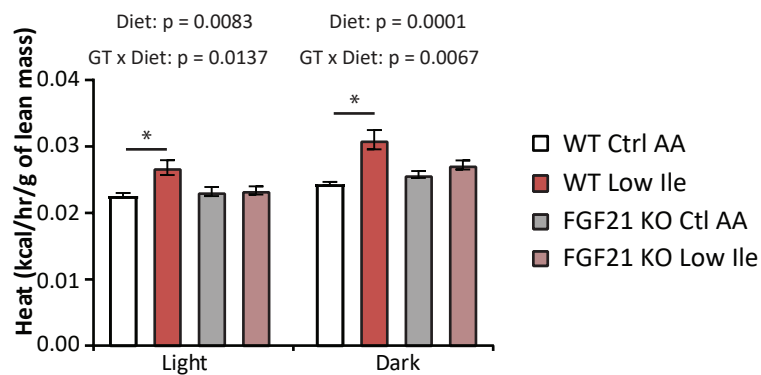

F

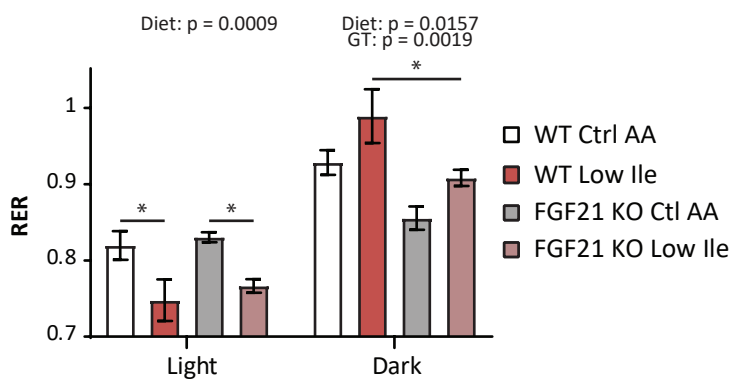

G

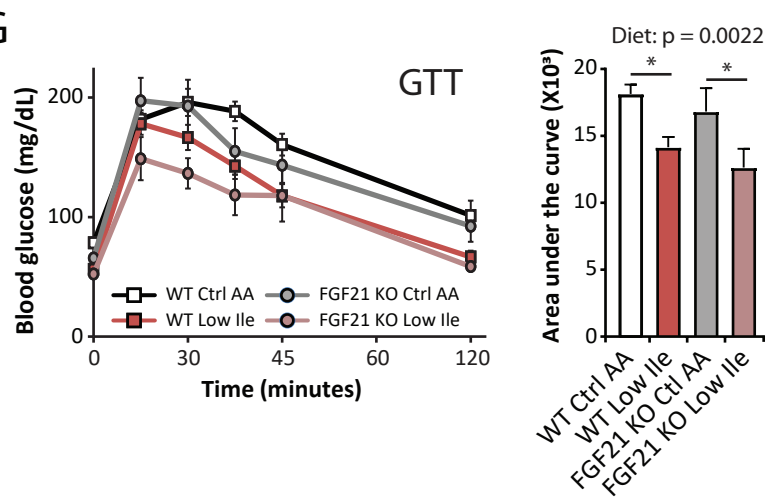

H

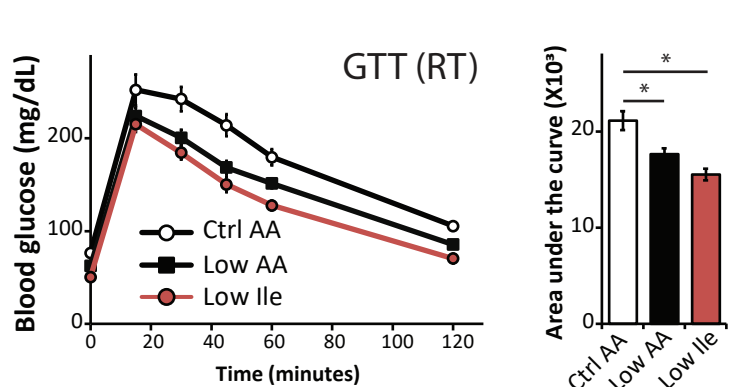

I

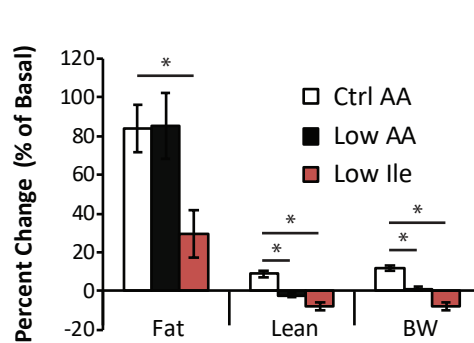

**Figure S5, related to Figure 5. Reducing dietary isoleucine induces the FGF21-UCP1 axis and promotes energy expenditure.** (A-B) Food consumption per mouse (A) or normalized by lean mass (B) measured after three weeks of feeding the indicated diets to wild-type and FGF21 KO mice. (C) Percent change in fat mass, lean mass, and body weight. (A-C) n = 6-9/group; the overall effect of genotype (GT), diet, and the interaction represent the p-value from a two-way ANOVA conducted separately for the light and dark cycles; \*p < 0.05, Sidak's test post two-way ANOVA. (D-F) Energy expenditure (heat) per mouse (D), energy expenditure normalized by lean mass (E), and RER (F) measured using metabolic chambers after twelve weeks of diet feeding to wild-type and FGF21 KO mice (n = 6-9/group; the overall effect of genotype (GT), diet, and the interaction represent the p-value from a two-way ANOVA conducted separately for the light and dark cycles; \*p < 0.05, Sidak's test post two-way ANOVA). (G) Glucose tolerance test from wild-type and FGF21 KO mice fed the indicated diets for 3 weeks (n=6-12/group; the overall effect of genotype (GT), diet, and the interaction represent the p-value from a two-way ANOVA; \*p < 0.05, Sidak's test post two-way ANOVA). (H and I) Glucose tolerance test (H) and change in body composition (I) of mice on the indicated diets housed at room temperature (RT, 23°C) (n = 12/group; significance was calculated using Sidak's test following ANOVA, \*p < 0.05). Data are represented as mean ± SEM.

Figure S6

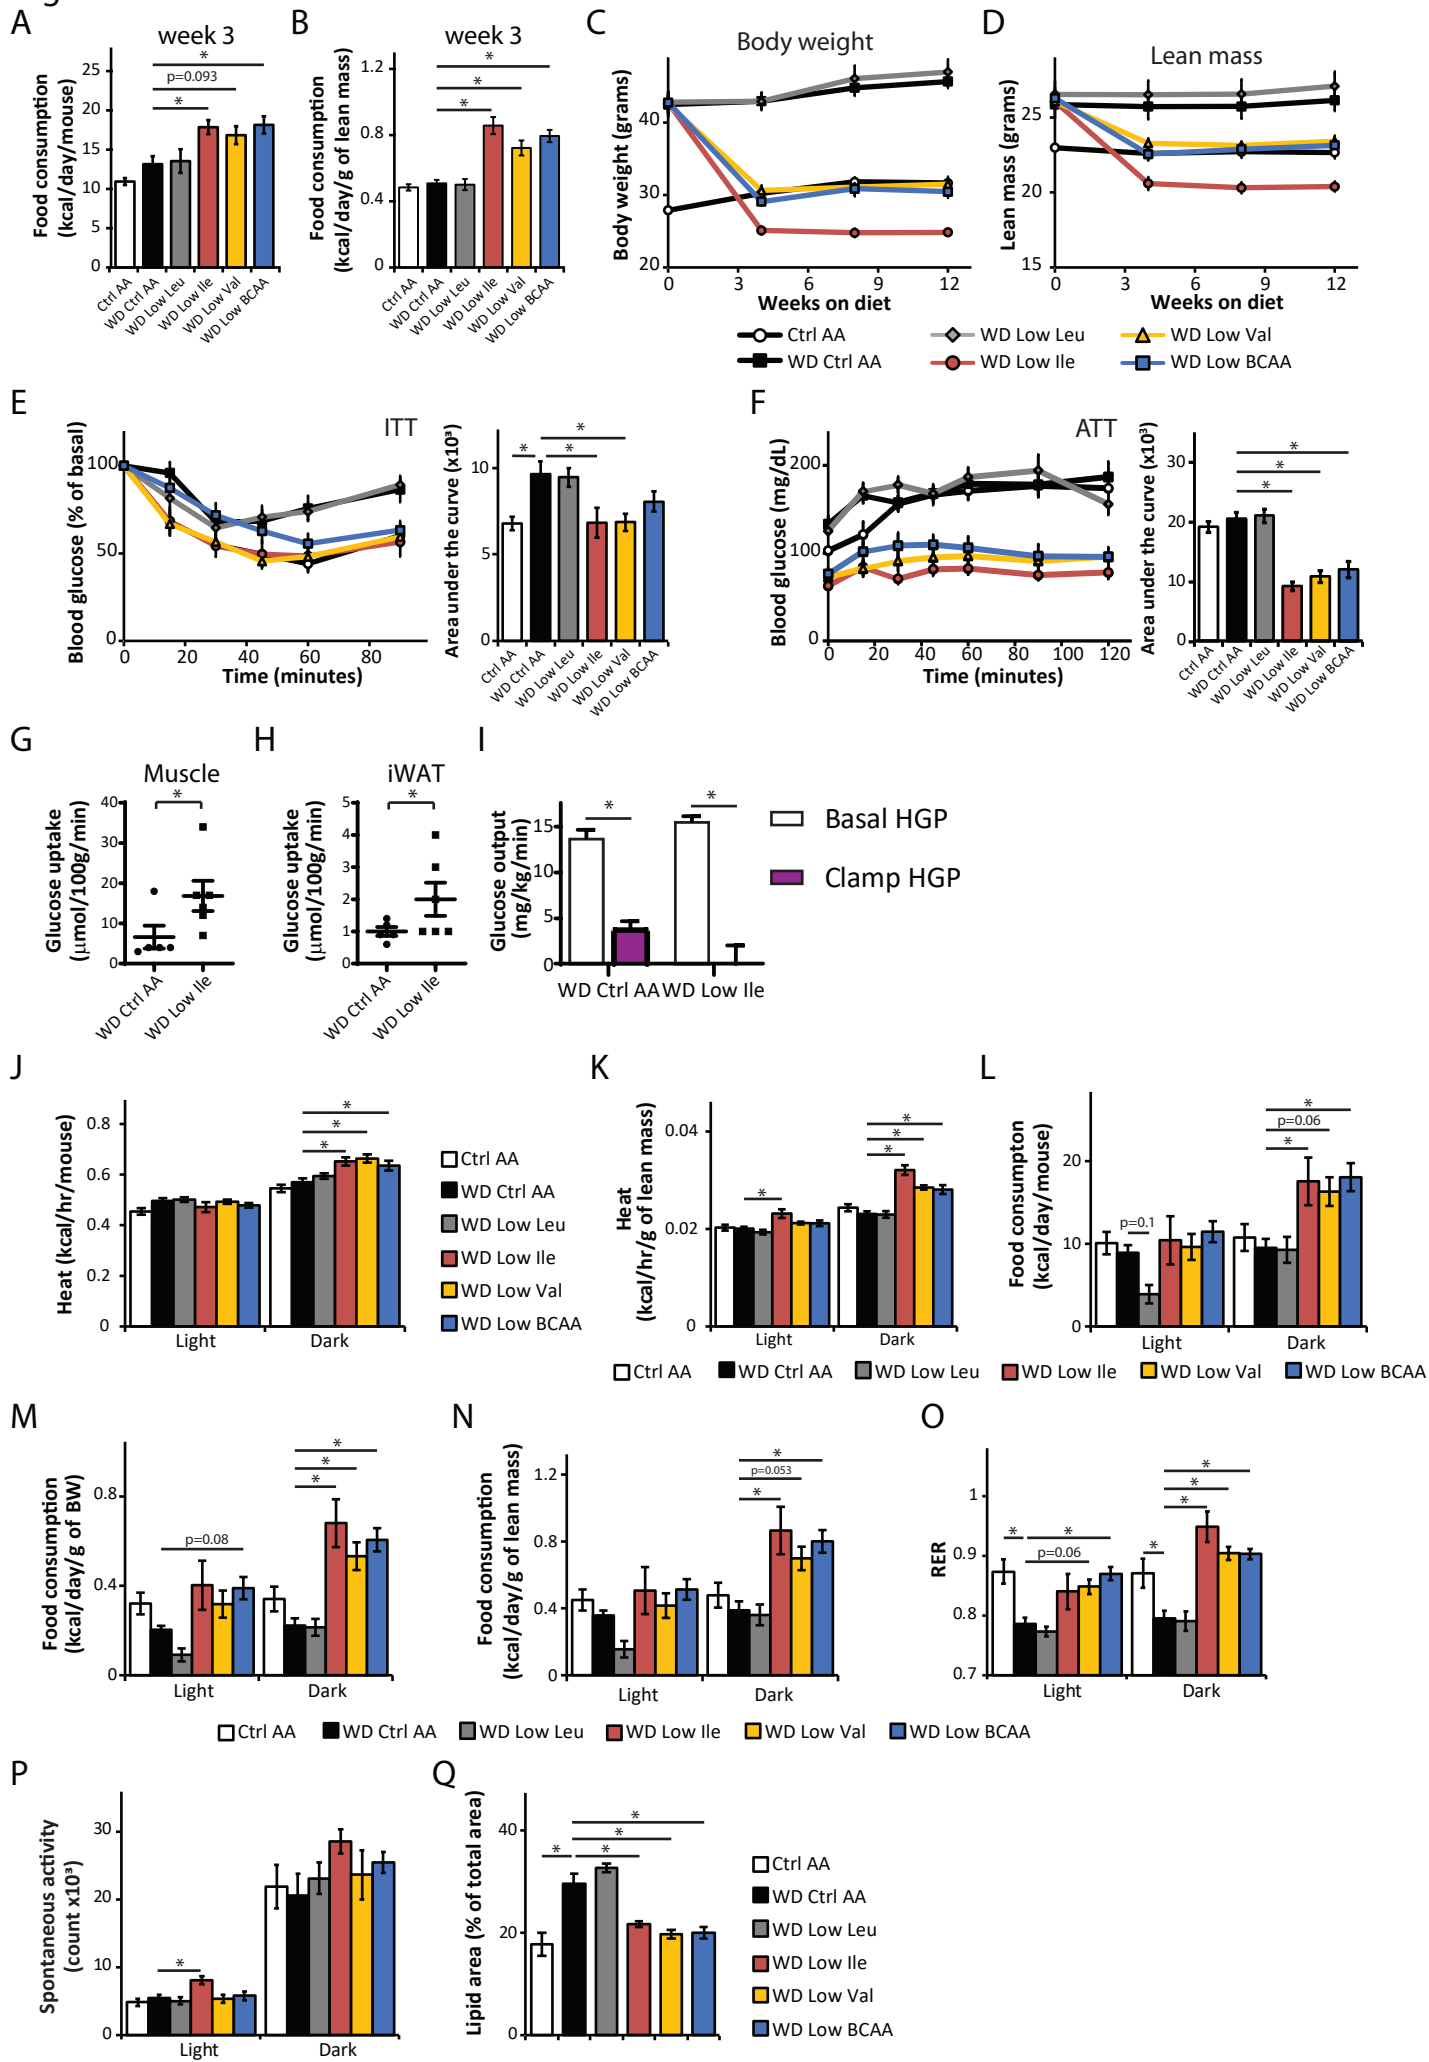

**Figure S6, related to Figure 6. Restricting dietary isoleucine or valine improves metabolic health of diet-induced obese mice.** (A-B) Average food consumption per mouse (A) or normalized by lean mass (B) of mice during the third week on the indicated diets (n=5-6 cages of 2 animals each/group; significance was calculated using Dunnett's test following ANOVA, means of different diet groups were compared to that of WD Ctrl AA diet group. \*p<0.05). (C-D) Body weight (C) and lean mass (D) of mice on the indicated diets (n=10/group). (E-F) Insulin (E) and alanine (F) tolerance tests of mice after 4 or 5 weeks, respectively, of indicated diet feeding (n=10/group; significance was calculated using Dunnett's test following ANOVA, means of different diet groups were compared to that of WD Ctrl AA diet group. \*p<0.05). (G-I) Glucose uptake into muscle (G) and iWAT (H), and basal and clamp hepatic gluconeogenesis (I) were determined during a hyperinsulinemic-euglycemic clamp in diet-induced obese mice switched to either a WD Ctrl AA diet or a WD Low Ile diet for 3 weeks. Each symbol represents a single animal, n=5-6/group. Significance was calculated using 1-tailed Student's t-test, \*p<0.05. (J-P) Energy expenditure (heat) per mouse (J), energy expenditure normalized by lean mass (K), Food consumption per mouse (L), food consumption normalized by body weight (M), food consumption normalized by lean mass (N), respiratory exchange ratio (O), and spontaneous activity (P) of mice after 6 weeks on the indicated diets. n=5-8/group. (Q) Quantification of lipid droplet area in Figure 6I. n=4/group. (J-Q) Significance was calculated using Dunnett's test following ANOVA, (J-P) conducted separately for the light and dark cycles; means of different diet groups were compared to that of WD Ctrl AA diet group; \*p < 0.05. Data are represented as mean ± SEM.

Figure S7

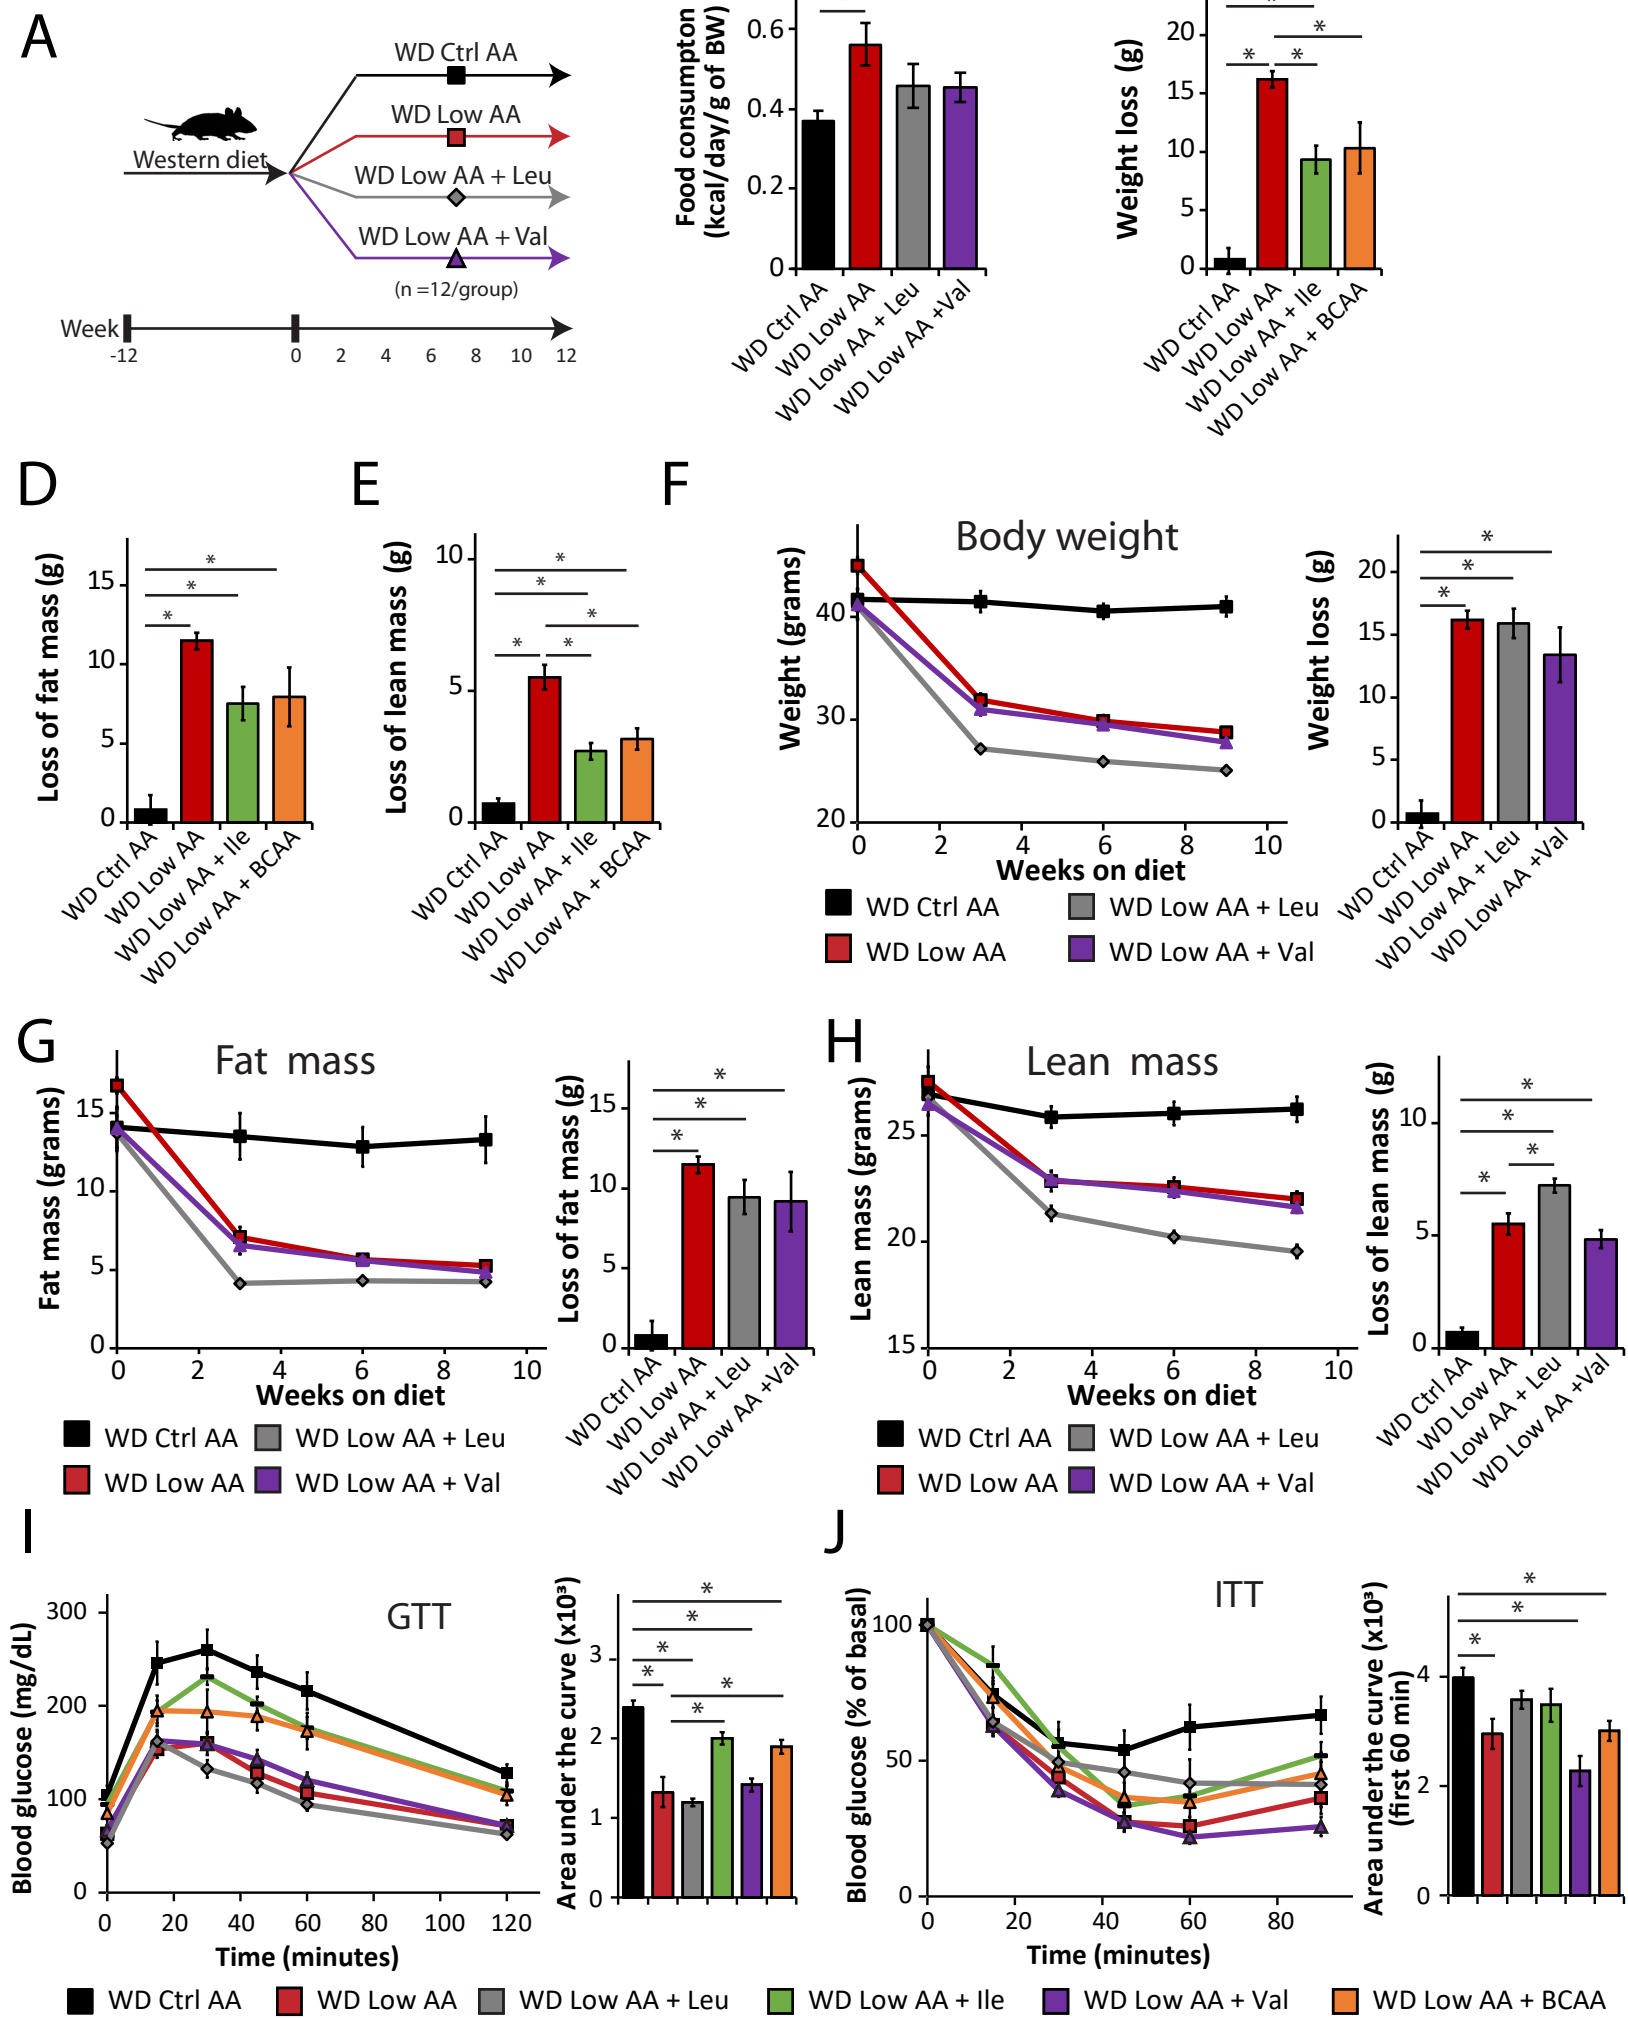

**Figure S7, related to Figure 7. Increased isoleucine intake attenuates the beneficial effects of PR on obesity and is associated with higher BMI in human.**

(A) Experimental scheme. 6-week-old male C57BL/6J mice were fed a western diet (WD) for 12 weeks and then switched to the indicated diets. (B) Average food consumption during the first month on the indicated diets normalized by body weight (n=6 cages of 2 animals each/group; \*p<0.05, Sidak's test post ANOVA; each group compared to the WD Ctrl AA and WD Low AA groups.). (C–E) Loss of body weight (C), fat mass (D), and lean mass (E) of mice consuming WD Ctrl AA, WD Low AA, WD Low AA + Ile, and WD Low AA + BCAA diets. (C-E) n=11-12/group; significance was calculated using Sidak's test following ANOVA. Means of different diet groups were compared to that of WD Ctrl AA and WD Low AA diet groups. \*p < 0.05. (F–I) Physiological impact of addback of Leu and Valine to a WD Low AA diet. Body weight (F), fat mass (G), lean mass (H), and glucose tolerance (I) of mice consuming the indicated diets (n=11-12/group; significance was calculated using Sidak's test following ANOVA. Means of different diet groups were compared to that of WD Ctrl AA and WD Low AA diet groups. \*p < 0.05). (J) Insulin tolerance of mice consuming the indicated diets (n=10-12/group; significance was calculated using Sidak's test following ANOVA. Means of different diet groups were compared to that of WD Ctrl AA diet group. \*p < 0.05). (B–J) WD Ctrl AA, WD Low AA, WD Low AA + Ile and WD Low AA + BCAA data are duplicated from Figure 7 to allow comparison. Data are represented as mean ± SEM.

## **Supplemental Table Legends**

**Supplemental Table 1, related to Figures 1, 3, 4, and 5. Diet composition of diets used to investigate the effect of reduced levels of individual BCAAs in the context of a normal calorie diet.**

**Supplemental Table 2, related to Figure 2. Diet composition of diets used to investigate the effect of supplementation of individual BCAAs to the Low AA diet in the context of a normal calorie diet.**

**Supplemental Table 4, related to Figure 6. Diet composition of diets used to investigate the effect of reduced levels of individual BCAAs in the context of a WD.**

**Supplemental Table 5, related to Figure 7. Diet composition of diets used to investigate the effect of supplementation of individual BCAAs to the Low AA diet in the context of a WD.**

**Supplemental Table 6, related to Figure 7. Associations between leucine, isoleucine and valine consumption and BMI in population-based samples; SHOW population demographics**

**Supplemental Table 7, related to Figure 5 and Star Methods. Sequences of primers used in the study.**





Table S2

| Amino Acid Defined Diets                                                              | Ctrl AA     | Low AA      | Low AA + Leu                   | Low AA + Ile                  | Low AA + Val                  | Low AA + BCAA               |
|---------------------------------------------------------------------------------------|-------------|-------------|--------------------------------|-------------------------------|-------------------------------|-----------------------------|
| Teklad Diet name                                                                      | 21% Protein | 7% Protein  | Low AA Diet w/<br>25.4g/kg Leu | Low AA Diet w/<br>7.8g/kg Ile | Low AA Diet w/<br>8.4g/kg Val | Low AA Diet w/<br>High BCAA |
| Teklad Diet number                                                                    | TD.140711   | TD.140712   | TD.170671                      | TD.170670                     | TD.170672                     | TD.160794                   |
| Color                                                                                 | Red         | Blue        | Green                          | Yellow                        | Black                         | Orange                      |
| <b>Formula</b>                                                                        | <b>g/kg</b> | <b>g/kg</b> | <b>g/kg</b>                    | <b>g/kg</b>                   | <b>g/kg</b>                   | <b>g/kg</b>                 |
| L-Alanine                                                                             | 9.38        | 3.05        | 3.05                           | 3.05                          | 3.05                          | 3.05                        |
| L-Arginine                                                                            | 6.3         | 2.05        | 2.05                           | 2.05                          | 2.05                          | 2.05                        |
| L-Asparagine                                                                          | 20.58       | 6.7         | 6.7                            | 6.7                           | 6.7                           | 6.7                         |
| L-Aspartic Acid                                                                       | 20.58       | 6.7         | 6.7                            | 6.7                           | 6.7                           | 6.7                         |
| L-Cysteine                                                                            | 7.2         | 2.34        | 2.34                           | 2.34                          | 2.34                          | 2.34                        |
| L-Glutamic Acid                                                                       | 28.97       | 9.43        | 9.43                           | 9.43                          | 9.43                          | 9.43                        |
| L-Glutamine                                                                           | 33.77       | 11          | 11                             | 11                            | 11                            | 11                          |
| Glycine                                                                               | 2.96        | 0.96        | 0.96                           | 0.96                          | 0.96                          | 0.96                        |
| L-Histidine HCl, monohydrate                                                          | 4.6         | 1.5         | 1.5                            | 1.5                           | 1.5                           | 1.5                         |
| L-Isoleucine                                                                          | 7.8         | 2.54        | 2.54                           | 7.8                           | 2.54                          | 7.8                         |
| L-Leucine                                                                             | 25.4        | 8.27        | 25.4                           | 8.27                          | 8.27                          | 25.4                        |
| L-Lysine HCl                                                                          | 20.38       | 6.64        | 6.64                           | 6.64                          | 6.64                          | 6.64                        |
| L-Methionine                                                                          | 6.7         | 2.18        | 2.18                           | 2.18                          | 2.18                          | 2.18                        |
| L-Phenylalanine                                                                       | 6.6         | 2.15        | 2.15                           | 2.15                          | 2.15                          | 2.15                        |
| L-Proline                                                                             | 7.41        | 2.41        | 2.41                           | 2.41                          | 2.41                          | 2.41                        |
| L-Serine                                                                              | 7.41        | 2.41        | 2.41                           | 2.41                          | 2.41                          | 2.41                        |
| L-Threonine                                                                           | 9.7         | 3.16        | 3.16                           | 3.16                          | 3.16                          | 3.16                        |
| L-Tryptophan                                                                          | 3.4         | 1.1         | 1.1                            | 1.1                           | 1.1                           | 1.1                         |
| L-Tyrosine                                                                            | 6.9         | 2.25        | 2.25                           | 2.25                          | 2.25                          | 2.25                        |
| L-Valine                                                                              | 8.4         | 2.735       | 2.735                          | 2.735                         | 8.4                           | 8.4                         |
| Sucrose                                                                               | 291.248     | 291.248     | 291.248                        | 291.248                       | 291.248                       | 291.248                     |
| Corn Starch                                                                           | 150.0       | 232.4325    | 223.8675                       | 229.8025                      | 229.6                         | 218.405                     |
| Maltodextrin                                                                          | 150.0       | 232.4325    | 223.8675                       | 229.8025                      | 229.6                         | 218.405                     |
| Anhydrous Milkfat                                                                     | 0.0         |             | 0                              | 0                             | 0                             | 0                           |
| Cholesterol                                                                           | 0.0         |             | 0                              | 0                             | 0                             | 0                           |
| Corn Oil                                                                              | 52.0        | 52.0        | 52.0                           | 52.0                          | 52.0                          | 52.0                        |
| Olive Oil                                                                             | 29.0        | 29.0        | 29.0                           | 29.0                          | 29.0                          | 29.0                        |
| Cellulose                                                                             | 30.0        | 30          | 30                             | 30                            | 30                            | 30                          |
| Mineral Mix, AIN-93M-MX (94049)                                                       | 35.0        | 35          | 35                             | 35                            | 35                            | 35                          |
| Calcium Phosphate Ca(H <sub>2</sub> PO <sub>4</sub> ) <sub>2</sub> · H <sub>2</sub> O | 8.2         | 8.2         | 8.2                            | 8.2                           | 8.2                           | 8.2                         |
| Vitamin Mix, Teklad (40060)                                                           | 10.0        | 10          | 10                             | 10                            | 10                            | 10                          |
| TBHQ, antioxidant                                                                     | 0.012       | 0.012       | 0.012                          | 0.012                         | 0.012                         | 0.012                       |
| Food Coloring                                                                         | 0.1         | 0.1         | 0.1                            | 0.1                           | 0.1                           | 0.1                         |
| <b>% kcal from</b>                                                                    |             |             |                                |                               |                               |                             |
| Protein (based on N x 6.25)                                                           | 22          | 7.1         | 8.3                            | 7.5                           | 7.5                           | 9.1                         |
| Carbohydrates                                                                         | 59.4        | 74.4        | 73.1                           | 74                            | 73.9                          | 72.3                        |
| Fat                                                                                   | 18.6        | 18.5        | 18.6                           | 18.5                          | 18.5                          | 18.6                        |
| Kcal/g                                                                                | 3.9         | 3.9         | 3.9                            | 3.9                           | 3.9                           | 3.9                         |

Table S4

| Amino Acid Defined Diets                                                              | Ctrl AA     | WD Ctrl AA                                    | WD Low Leu                                | WD Low Ile                                | WD Low Val                                | WD Low BCAA                              |
|---------------------------------------------------------------------------------------|-------------|-----------------------------------------------|-------------------------------------------|-------------------------------------------|-------------------------------------------|------------------------------------------|
| Teklad Diet name                                                                      | 21% Protein | AA Adj Calories,<br>21% Milkfat,<br>0.2% Chol | Leu 2/3 Adj,<br>21% Milkfat,<br>0.2% Chol | Ile 2/3 Adj, 21%<br>Milkfat, 0.2%<br>Chol | Val 2/3 Adj,<br>21% Milkfat,<br>0.2% Chol | BCAA 2/3 Adj,<br>42% Fat, 21%<br>Protein |
| Teklad Diet number                                                                    | TD.140711   | TD.160186                                     | TD.170483                                 | TD.170484                                 | TD.170485                                 | TD.160188                                |
| Color                                                                                 | Red         | Aqua                                          | Purple                                    | Red                                       | Brown                                     | Black                                    |
| Formula                                                                               | g/kg        | g/kg                                          | g/kg                                      | g/kg                                      | g/kg                                      | g/kg                                     |
| L-Alanine                                                                             | 9.38        | 9.38                                          | 10.8334                                   | 9.8267                                    | 9.9183                                    | 11.8183                                  |
| L-Arginine                                                                            | 6.3         | 6.3                                           | 6.3                                       | 6.3                                       | 6.3                                       | 6.3                                      |
| L-Asparagine                                                                          | 20.58       | 20.58                                         | 21.6577                                   | 20.9113                                   | 20.9792                                   | 22.388                                   |
| L-Aspartic Acid                                                                       | 20.58       | 20.58                                         | 22.7518                                   | 21.2475                                   | 21.3844                                   | 24.2237                                  |
| L-Cysteine                                                                            | 7.2         | 7.2                                           | 7.2                                       | 7.2                                       | 7.2                                       | 7.2                                      |
| L-Glutamic Acid                                                                       | 28.97       | 28.97                                         | 31.37                                     | 29.7077                                   | 29.859                                    | 32.9963                                  |
| L-Glutamine                                                                           | 33.77       | 33.77                                         | 34.9725                                   | 34.1395                                   | 34.2154                                   | 35.7873                                  |
| Glycine                                                                               | 2.96        | 2.96                                          | 4.1844                                    | 3.3363                                    | 3.4135                                    | 5.0141                                   |
| L-Histidine HCl, monohydrate                                                          | 4.6         | 4.6                                           | 4.6                                       | 4.6                                       | 4.6                                       | 4.6                                      |
| L-Isoleucine                                                                          | 7.8         | 7.8                                           | 7.8                                       | 2.54                                      | 7.8                                       | 2.54                                     |
| L-Leucine                                                                             | 25.4        | 25.4                                          | 8.27                                      | 25.4                                      | 25.4                                      | 8.27                                     |
| L-Lysine HCl                                                                          | 20.38       | 20.38                                         | 20.38                                     | 20.38                                     | 20.38                                     | 20.38                                    |
| L-Methionine                                                                          | 6.7         | 6.7                                           | 6.7                                       | 6.7                                       | 6.7                                       | 6.7                                      |
| L-Phenylalanine                                                                       | 6.6         | 6.6                                           | 6.6                                       | 6.6                                       | 6.6                                       | 6.6                                      |
| L-Proline                                                                             | 7.41        | 7.41                                          | 9.2874                                    | 7.987                                     | 8.1054                                    | 10.5596                                  |
| L-Serine                                                                              | 7.41        | 7.41                                          | 9.124                                     | 7.9368                                    | 8.0448                                    | 10.2855                                  |
| L-Threonine                                                                           | 9.7         | 9.7                                           | 9.7                                       | 9.7                                       | 9.7                                       | 9.7                                      |
| L-Tryptophan                                                                          | 3.4         | 3.4                                           | 3.4                                       | 3.4                                       | 3.4                                       | 3.4                                      |
| L-Tyrosine                                                                            | 6.9         | 6.9                                           | 6.9                                       | 6.9                                       | 6.9                                       | 6.9                                      |
| L-Valine                                                                              | 8.4         | 8.4                                           | 8.7                                       | 8.4                                       | 2.735                                     | 2.735                                    |
| Sucrose                                                                               | 291.248     | 341.46                                        | 341.46                                    | 341.46                                    | 341.46                                    | 341.46                                   |
| Corn Starch                                                                           | 150.0       | 49.63                                         | 51.6344                                   | 50.2436                                   | 50.0325                                   | 52.6511                                  |
| Maltodextrin                                                                          | 150.0       | 49.63                                         | 51.6344                                   | 50.2436                                   | 50.0325                                   | 52.6511                                  |
| Anhydrous Milkfat                                                                     | 0.0         | 210                                           | 210                                       | 210                                       | 210                                       | 210                                      |
| Cholesterol                                                                           | 0.0         | 1.5                                           | 1.5                                       | 1.5                                       | 1.5                                       | 1.5                                      |
| Corn Oil                                                                              | 52.0        | 0.0                                           | 0.0                                       | 0.0                                       | 0.0                                       | 0.0                                      |
| Olive Oil                                                                             | 29.0        | 0.0                                           | 0.0                                       | 0.0                                       | 0.0                                       | 0.0                                      |
| Cellulose                                                                             | 30.0        | 50                                            | 50                                        | 50                                        | 50                                        | 50                                       |
| Mineral Mix, AIN-93M-MX (94049)                                                       | 35.0        | 35                                            | 35                                        | 35                                        | 35                                        | 35                                       |
| Calcium Phosphate Ca(H <sub>2</sub> PO <sub>4</sub> ) <sub>2</sub> · H <sub>2</sub> O | 8.2         | 8.2                                           | 8.2                                       | 8.2                                       | 8.2                                       | 8.2                                      |
| Vitamin Mix, Teklad (40060)                                                           | 10.0        | 10                                            | 10                                        | 10                                        | 10                                        | 10                                       |
| TBHQ, antioxidant                                                                     | 0.012       | 0.04                                          | 0.04                                      | 0.04                                      | 0.04                                      | 0.04                                     |
| Food Coloring                                                                         | 0.1         | 0.1                                           | 0.1                                       | 0.1                                       | 0.1                                       | 0.1                                      |
| <b>% kcal from</b>                                                                    |             |                                               |                                           |                                           |                                           |                                          |
| Protein (based on N x 6.25)                                                           | 22          | 20.7                                          | 18.9                                      | 19                                        | 19                                        | 20.2                                     |
| Carbohydrates                                                                         | 59.4        | 38.5                                          | 39.5                                      | 39.3                                      | 39.3                                      | 39                                       |
| Fat                                                                                   | 18.6        | 40.9                                          | 41.6                                      | 41.7                                      | 41.7                                      | 40.9                                     |
| Kcal/g                                                                                | 3.9         | 4.6                                           | 4.5                                       | 4.5                                       | 4.5                                       | 4.6                                      |

Table S5

| Amino Acid Defined Diets                                                              | Ctrl AA     | WD Ctrl AA                                    | WD Low AA                                      | WD Low AA + Leu               | WD Low AA + Ile               | WD Low AA + Val               | WD Low AA + BCAA           |
|---------------------------------------------------------------------------------------|-------------|-----------------------------------------------|------------------------------------------------|-------------------------------|-------------------------------|-------------------------------|----------------------------|
| Teklad Diet name                                                                      | 21% Protein | AA Adj Calories,<br>21% Milkfat,<br>0.2% Chol | AA Adj Calories,<br>7% Protein, 21%<br>Milkfat | Low AA Western<br>(2.54% Leu) | Low AA Western<br>(0.78% Ile) | Low AA Western<br>(0.84% Val) | BCAA Adj Low AA<br>Western |
| Teklad Diet number                                                                    | TD.140711   | TD.160186                                     | TD.160187                                      | TD.171011                     | TD.171012                     | TD.171013                     | TD.171014                  |
| Color                                                                                 | Red         | Aqua                                          | Orange                                         | Yellow                        | Pink                          | Purple                        | Brown                      |
| Formula                                                                               | g/kg        | g/kg                                          | g/kg                                           | g/kg                          | g/kg                          | g/kg                          | g/kg                       |
| L-Alanine                                                                             | 9.38        | 9.38                                          | 3.05                                           | 3.05                          | 3.05                          | 3.05                          | 3.05                       |
| L-Arginine                                                                            | 6.3         | 6.3                                           | 2.05                                           | 2.05                          | 2.05                          | 2.05                          | 2.05                       |
| L-Asparagine                                                                          | 20.58       | 20.58                                         | 6.7                                            | 6.7                           | 6.7                           | 6.7                           | 6.7                        |
| L-Aspartic Acid                                                                       | 20.58       | 20.58                                         | 6.7                                            | 6.7                           | 6.7                           | 6.7                           | 6.7                        |
| L-Cysteine                                                                            | 7.2         | 7.2                                           | 2.34                                           | 2.34                          | 2.34                          | 2.34                          | 2.34                       |
| L-Glutamic Acid                                                                       | 28.97       | 28.97                                         | 9.43                                           | 9.43                          | 9.43                          | 9.43                          | 9.43                       |
| L-Glutamine                                                                           | 33.77       | 33.77                                         | 11                                             | 11                            | 11                            | 11                            | 11                         |
| Glycine                                                                               | 2.96        | 2.96                                          | 0.96                                           | 0.96                          | 0.96                          | 0.96                          | 0.96                       |
| L-Histidine HCl, monohydrate                                                          | 4.6         | 4.6                                           | 1.5                                            | 1.5                           | 1.5                           | 1.5                           | 1.5                        |
| L-Isoleucine                                                                          | 7.8         | 7.8                                           | 2.54                                           | 2.54                          | 7.8                           | 2.54                          | 7.8                        |
| L-Leucine                                                                             | 25.4        | 25.4                                          | 8.27                                           | 25.4                          | 8.27                          | 8.27                          | 25.4                       |
| L-Lysine HCl                                                                          | 20.38       | 20.38                                         | 6.64                                           | 6.64                          | 6.64                          | 6.64                          | 6.64                       |
| L-Methionine                                                                          | 6.7         | 6.7                                           | 2.18                                           | 2.18                          | 2.18                          | 2.18                          | 2.18                       |
| L-Phenylalanine                                                                       | 6.6         | 6.6                                           | 2.15                                           | 2.15                          | 2.15                          | 2.15                          | 2.15                       |
| L-Proline                                                                             | 7.41        | 7.41                                          | 2.41                                           | 2.41                          | 2.41                          | 2.41                          | 2.41                       |
| L-Serine                                                                              | 7.41        | 7.41                                          | 2.41                                           | 2.41                          | 2.41                          | 2.41                          | 2.41                       |
| L-Threonine                                                                           | 9.7         | 9.7                                           | 3.16                                           | 3.16                          | 3.16                          | 3.16                          | 3.16                       |
| L-Tryptophan                                                                          | 3.4         | 3.4                                           | 1.1                                            | 1.1                           | 1.1                           | 1.1                           | 1.1                        |
| L-Tyrosine                                                                            | 6.9         | 6.9                                           | 2.25                                           | 2.25                          | 2.25                          | 2.25                          | 2.25                       |
| L-Valine                                                                              | 8.4         | 8.4                                           | 2.735                                          | 2.735                         | 2.735                         | 8.4                           | 8.4                        |
| Sucrose                                                                               | 291.248     | 341.46                                        | 341.46                                         | 341.46                        | 341.46                        | 341.46                        | 341.46                     |
| Corn Starch                                                                           | 150.0       | 49.63                                         | 132.0625                                       | 123.4975                      | 129.4325                      | 129.23                        | 118.035                    |
| Maltodextrin                                                                          | 150.0       | 49.63                                         | 132.0625                                       | 123.4975                      | 129.1325                      | 129.23                        | 118.035                    |
| Anhydrous Milkfat                                                                     | 0.0         | 210                                           | 210                                            | 210                           | 210                           | 210                           | 210                        |
| Cholesterol                                                                           | 0.0         | 1.5                                           | 1.5                                            | 1.5                           | 1.5                           | 1.5                           | 1.5                        |
| Corn Oil                                                                              | 52.0        | 0.0                                           | 0.0                                            | 0.0                           | 0.0                           | 0.0                           | 0.0                        |
| Olive Oil                                                                             | 29.0        | 0.0                                           | 0.0                                            | 0.0                           | 0.0                           | 0.0                           | 0.0                        |
| Cellulose                                                                             | 30.0        | 50                                            | 50                                             | 50                            | 50                            | 50                            | 50                         |
| Mineral Mix, AIN-93M-MX (94049)                                                       | 35.0        | 35                                            | 35                                             | 35                            | 35                            | 35                            | 35                         |
| Calcium Phosphate Ca(H <sub>2</sub> PO <sub>4</sub> ) <sub>2</sub> · H <sub>2</sub> O | 8.2         | 8.2                                           | 8.2                                            | 8.2                           | 8.2                           | 8.2                           | 8.2                        |
| Vitamin Mix, Teklad (40060)                                                           | 10.0        | 10                                            | 10                                             | 10                            | 10                            | 10                            | 10                         |
| TBHQ, antioxidant                                                                     | 0.012       | 0.04                                          | 0.04                                           | 0.04                          | 0.04                          | 0.04                          | 0.04                       |
| Food Coloring                                                                         | 0.1         | 0.1                                           | 0.1                                            | 0.1                           | 0.1                           | 0.1                           | 0.1                        |
| <b>% kcal from</b>                                                                    |             |                                               |                                                |                               |                               |                               |                            |
| Protein (based on N x 6.25)                                                           | 22          | 20.7                                          | 6.8                                            | 7.2                           | 6.5                           | 6.5                           | 7.9                        |
| Carbohydrates                                                                         | 59.4        | 38.5                                          | 52                                             | 51.2                          | 52                            | 52                            | 50.4                       |
| Fat                                                                                   | 18.6        | 40.9                                          | 41.2                                           | 41.6                          | 41.5                          | 41.5                          | 41.7                       |
| Kcal/g                                                                                | 3.9         | 4.6                                           | 4.6                                            | 4.5                           | 4.6                           | 4.6                           | 4.5                        |

Table S6: Associations between leucine, isoleucine and valine consumption and BMI in population-based samples; SHOW population demographics.

| % of Total Protein from Amino Acid of Interest (Grams of Protein from Amino Acid of Interest/Total Grams of Protein) | Association between Increased percent of diet from amino acid and body mass index <sup>+</sup> |                |         |
|----------------------------------------------------------------------------------------------------------------------|------------------------------------------------------------------------------------------------|----------------|---------|
|                                                                                                                      | Estimate                                                                                       | Standard Error | p-value |
| Isoleucine                                                                                                           | 2.46                                                                                           | 1.23           | 0.046*  |
| Valine                                                                                                               | 1.14                                                                                           | 1.06           | 0.283   |
| Leucine                                                                                                              | 1.06                                                                                           | 0.64           | 0.098   |

\*p-value less than .05; <sup>+</sup> regression models adjusted for age, gender, education, household income, saturated fat intake, total calories per day consumed & physical activity

| <b>SHOW Demographics</b>      |             |
|-------------------------------|-------------|
| <b>Age, mean ( SD)</b>        | 53.6 (16.4) |
| <b>male, n (%)</b>            | 333 (42.2)  |
| <b>BMI, mean (SD)</b>         | 30.6 (7.7)  |
| <b>BMI categories:</b>        |             |
| <25, n (%)                    | 189 (25.1)  |
| 25<30, n (%)                  | 226 (28.6)  |
| ≥ 30, n (%)                   | 365 (46.2)  |
| <b>Education:</b>             |             |
| < high school, n (%)          | 53 (6.72)   |
| HS Diploma/GED, n (%)         | 307 (38.9)  |
| > high school, n (%)          | 429 (54.4)  |
| <b>Race</b>                   |             |
| Non-Hispanic White, n (%)     | 628 (79.7)  |
| Black/African American, n (%) | 101 (12.8)  |
| Hispanic, n (%)               | 30 (3.8)    |
| Other, n (%)                  | 29 (3.7)    |

Table S7

| Gene name     | Forward sequence       | Reverse sequence      |
|---------------|------------------------|-----------------------|
| <i>Acc1</i>   | AAGGCTATGTGAAGGATG     | CTGTCTGAAGAGGTTAGG    |
| <i>Acc2</i>   | AGTCTTCCGTGCCTTTGTAC   | TTCTGCAAACCTCATCCCTCG |
| <i>Actb</i>   | ACCTTCTACAATGAGCTGCG   | CTGGATGGCTACGTACATGG  |
| <i>Atgl</i>   | ATATCCCACCTTAGCTCCAAGG | CAAGTTGTCTGAAATGCCGC  |
| <i>Cidea</i>  | GAATAGCCAGAGTCACCTTCG  | AGCAGATTCCTTAACACGGC  |
| <i>Elovl3</i> | ATGCAACCCTATGACTTCGAG  | ACGATGAGCAACAGATAGACG |
| <i>Fasn</i>   | CCCCTCTGTTAATTGGCTCC   | TTGTGGAAGTGCAGGTTAGG  |
| <i>Fgf21</i>  | CAAATCCTGGGTGTCAAAGC   | CATGGGCTTCAGACTGGTAC  |
| <i>Lipe1</i>  | CTGAGATTGAGGTGCTGTCC   | CAAGGGAGGTGAGATGGTAAC |
| <i>Ucp1</i>   | GCATTCAGAGGCAAATCAGC   | GCCACACCTCCAGTCATTAAG |
